# Supplementary material for: Role of the conformational flexibility of evodiamine in its binding to protein hosts: a comparative spectroscopic and molecular modeling evaluation with rutaecarpine
Source: Royal Society of Chemistry journal article supplement (doi:10.1039/c4cp02483d), 2014-01-01
Supplement: c4cp02483d1.pdf [file c4cp02483d1.pdf]

| <b>Sample</b>                 | <b><math>V_e</math> (mL)</b> | <b><math>nK_a</math> (<math>M^{-1}</math>)</b> |
|-------------------------------|------------------------------|------------------------------------------------|
| Solvent                       | 6                            | -                                              |
| ( <i>R</i> )-Oxazepam acetate | 10                           | $1.0 \times 10^4$                              |
| ( <i>S</i> )-Oxazepam acetate | 32                           | $8.0 \times 10^4$                              |
| Diazepam                      | 83                           | $1.8 \times 10^5$                              |
| (±)-EVD                       | 38                           | $1.0 \times 10^5$                              |
|                               | 88                           | $2.0 \times 10^5$                              |
| RTC                           | >> 200                       | $1.0 \times 10^6$                              |

**Supplementary Table 1**

Elution volumes ( $V_e$ ) and corresponding binding parameters obtained on a HSA-Sepharose column. Eluent: Ringer buffer, pH 7.4.

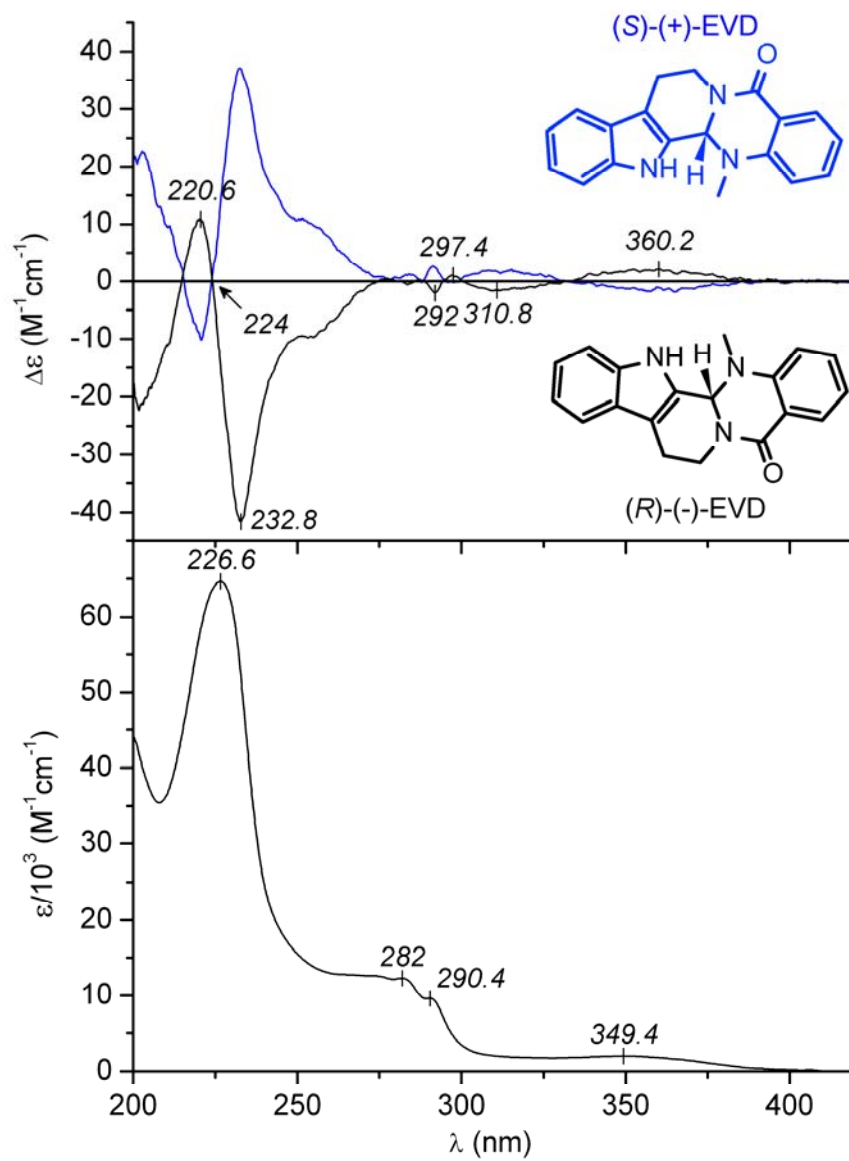

**Supplementary Figure 1**

CD and UV absorption spectra of EVD enantiomers measured in AcN.

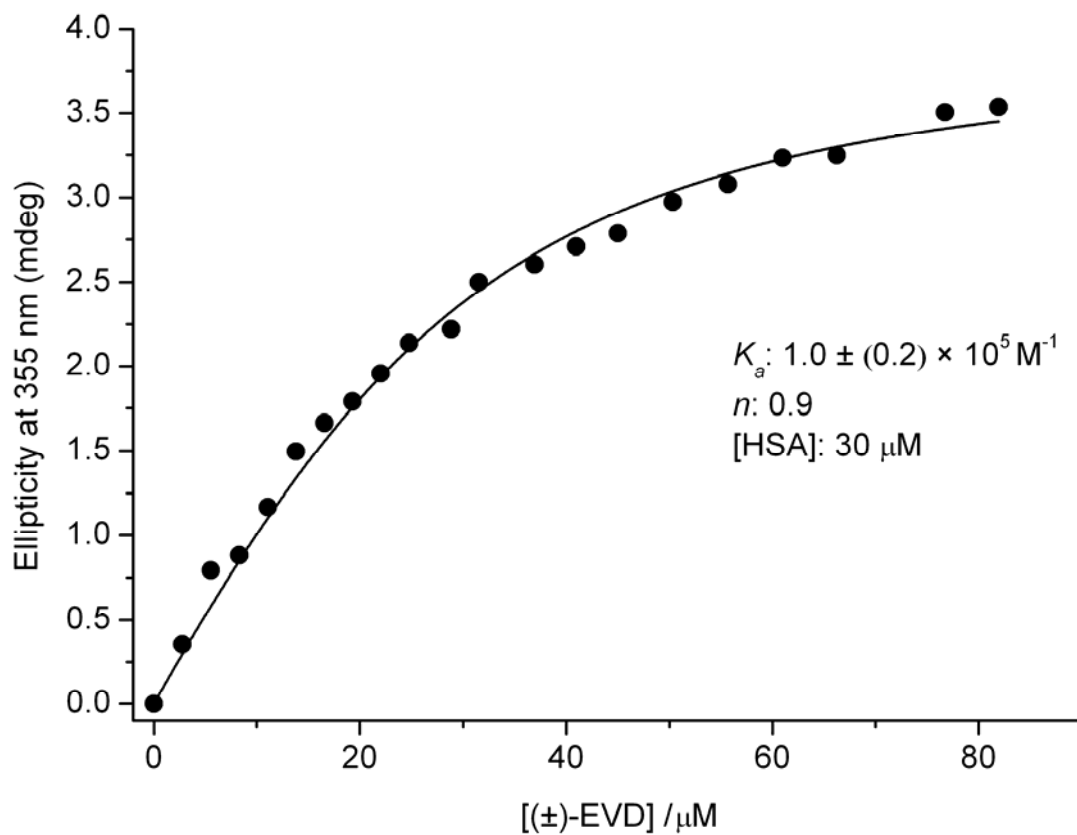

### Supplementary Figure 2

CD titration data of HSA with (±)-EVD for estimation the binding parameters (non-linear curve fitting analysis, solid line).

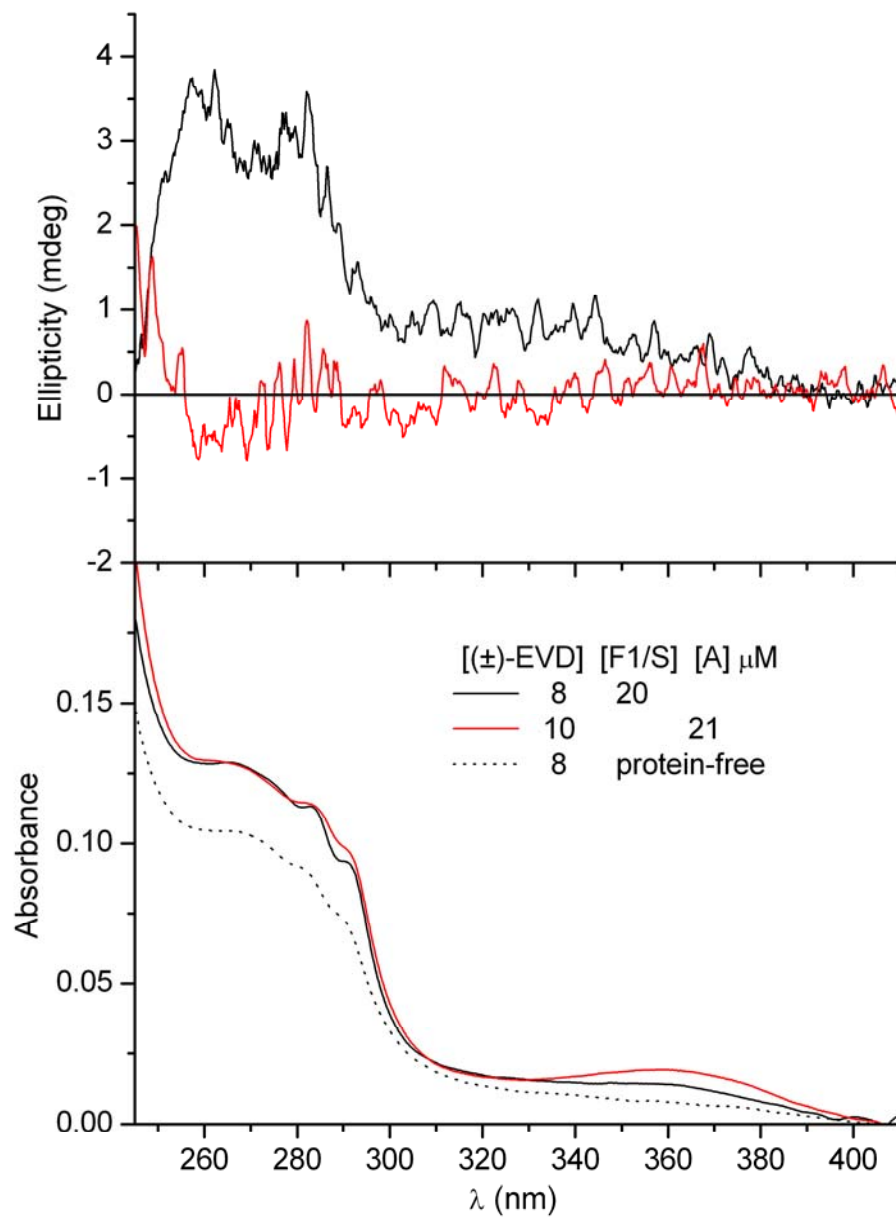

### Supplementary Figure 3

Difference CD and UV absorption spectra of ( $\pm$ )-EVD measured with the main genetic variants of AAG (Ringer buffer, 25 °C). Dotted line denotes the absorption spectrum of ( $\pm$ )-EVD recorded in protein-free buffer solution.

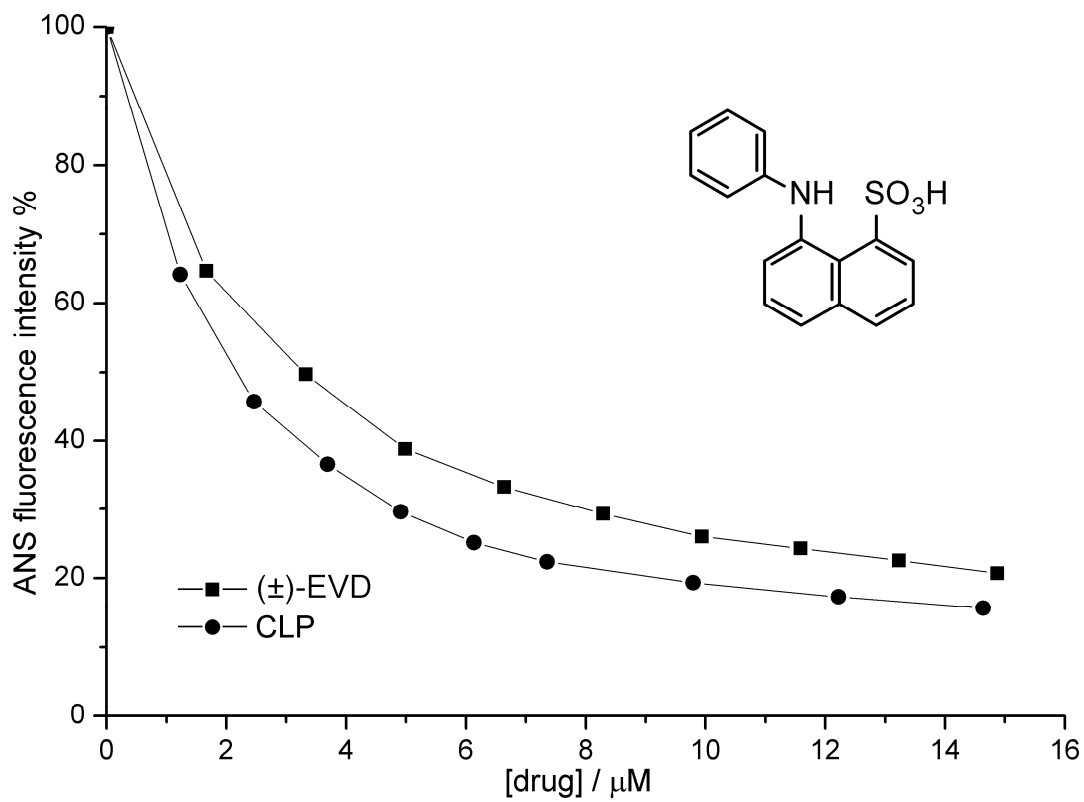

#### Supplementary Figure 4

Quenching of fluorescence of 2  $\mu\text{M}$  ANS in 5  $\mu\text{M}$  AAG solution by ( $\pm$ )-EVD and chlorpromazine (CLP). Excitation and emission wavelengths were 420 and 476 nm, respectively. Chemical structure of ANS is shown.

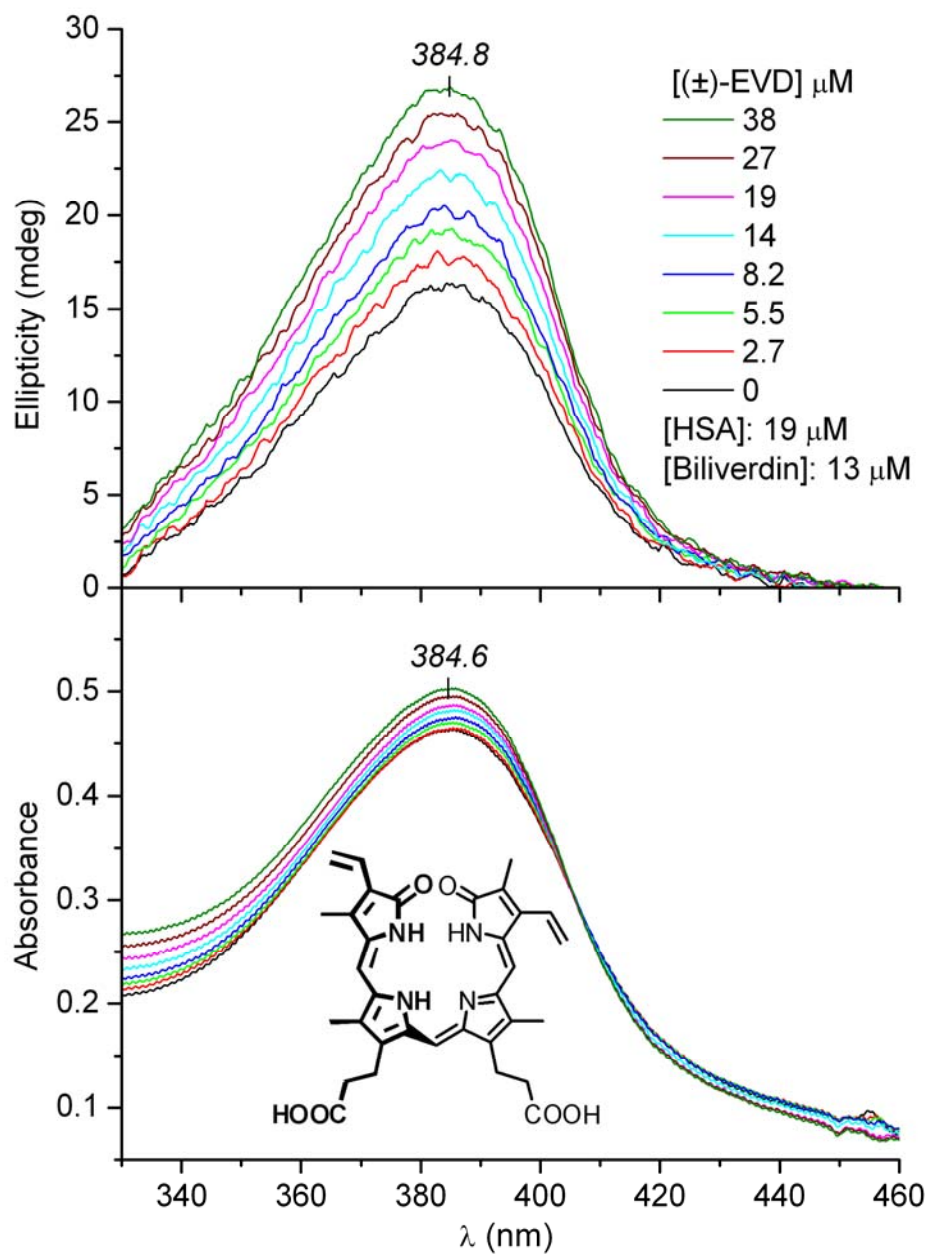

### Supplementary Figure 5

CD and absorption spectral changes of HSA bound biliverdin upon stepwise addition of  $(\pm)$ -EVD into the sample solution (Ringer buffer, 25 °C). *M*-helical conformation of biliverdin is shown.

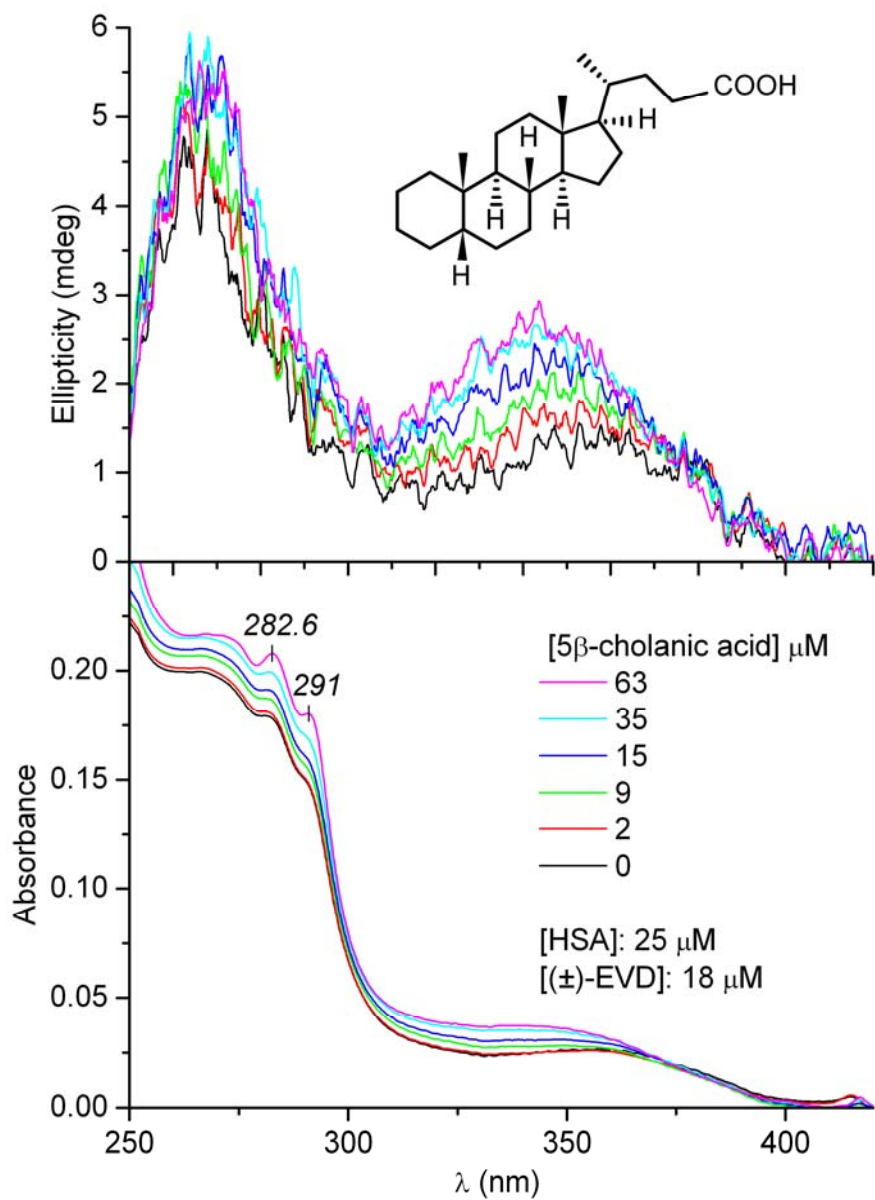

### Supplementary Figure 6

CD and absorption spectral changes of HSA bound ( $\pm$ )-EVD provoked upon stepwise addition of 5 $\beta$ -cholanic acid into the sample solution (Ringer buffer, 25  $^{\circ}$ C).

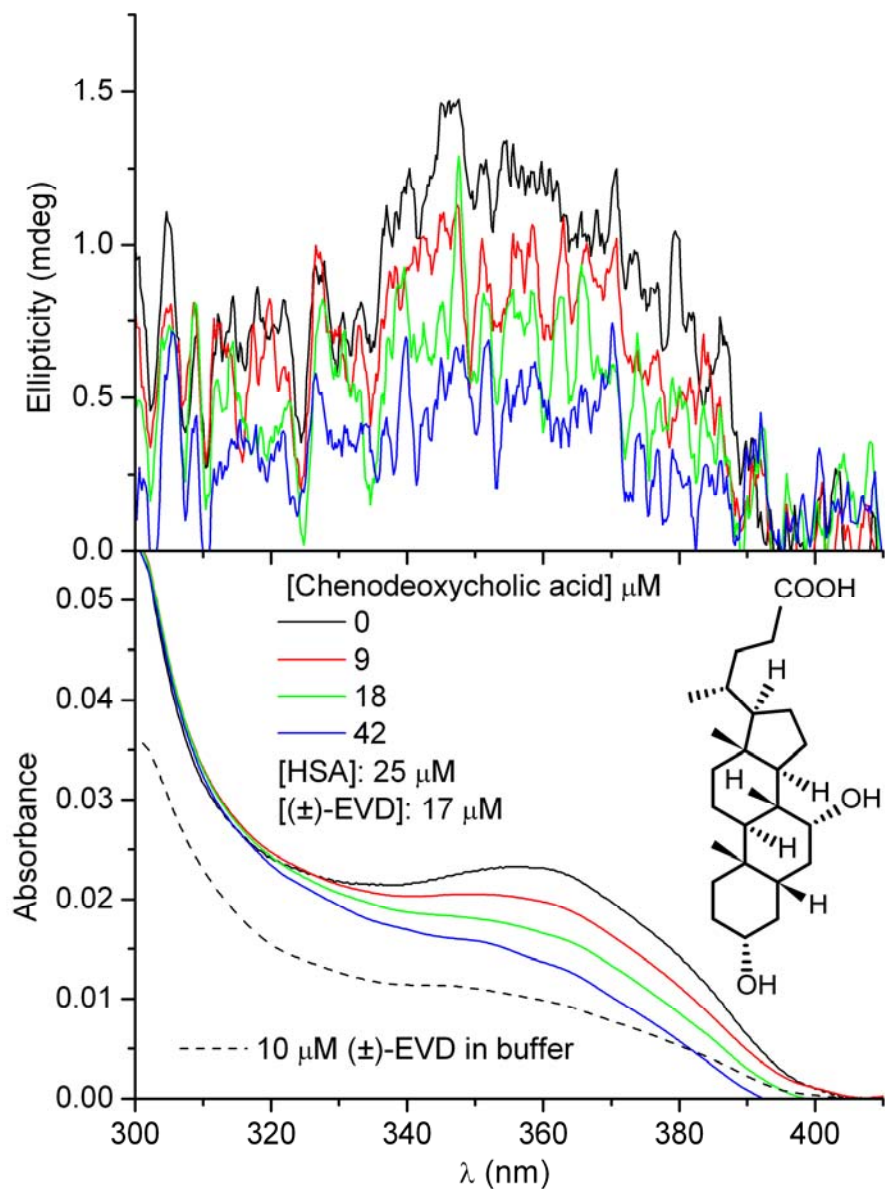

### Supplementary Figure 7

Changes of the ICD and UV spectra of HSA bound EVD upon stepwise addition of chenodeoxycholic acid (Ringer buffer, 25 °C). The absorption curve of free EVD is also displayed.



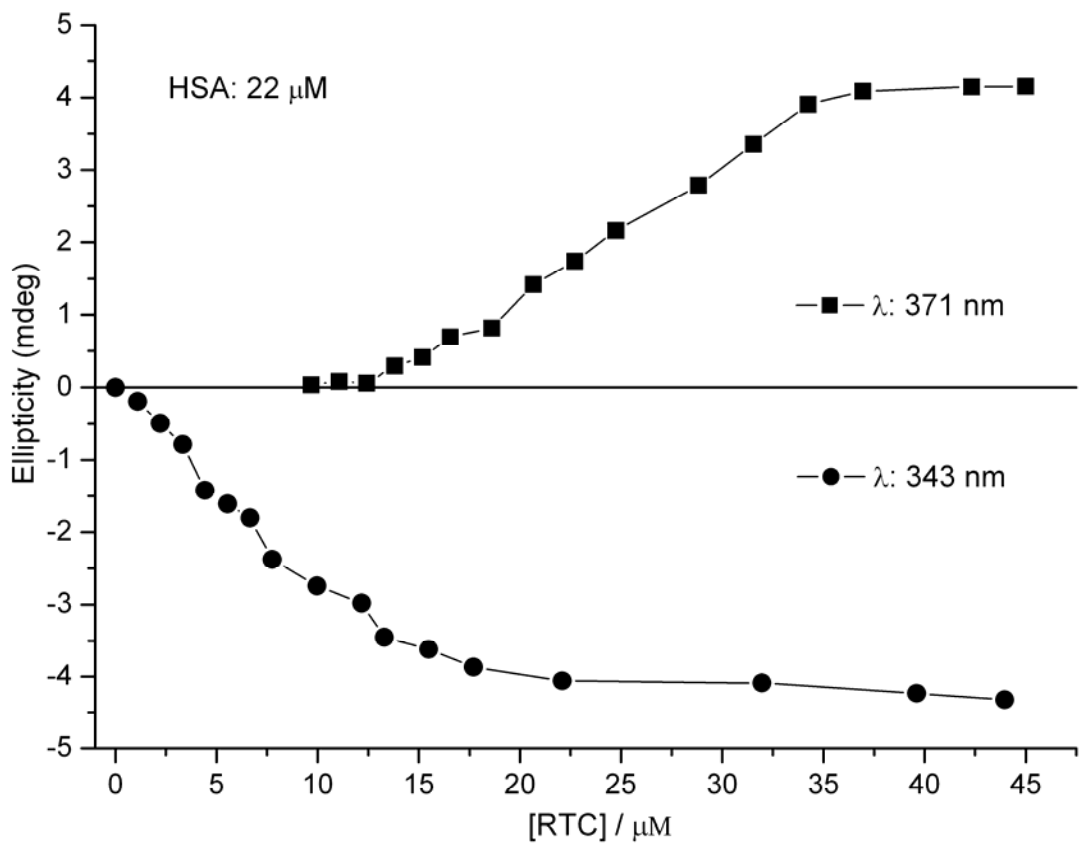

### Supplementary Figure 8

Plots of the induced ellipticity changes of RTC measured at two wavelengths during titration of HSA solution (Ringer buffer, 25 °C).

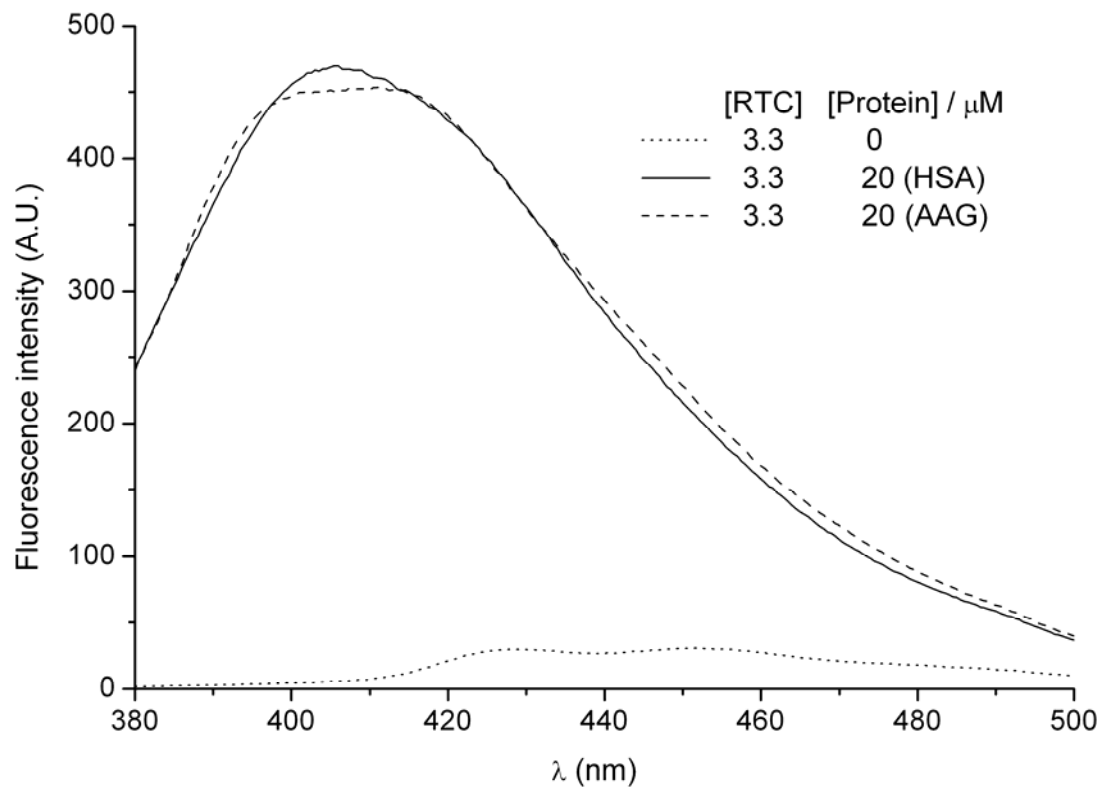

### Supplementary Figure 9

Fluorescence emission spectra of RTC in buffer, as well as in the presence of HSA and AAG.

Excitation was made at 360 nm.
